# Supplementary material for: DFT study on a fluorine-functionalized nitrogen- and boron-doped triangulene as an electrocatalyst for the oxygen reduction reaction
Source: Royal Society of Chemistry journal article supplement (doi:10.1039/d3se00570d), 2023-01-01
Supplement: d3se00570d1.pdf [file d3se00570d1.pdf]

## Supplementary Information

### **DFT Study on a Fluorine-Functionalized Nitrogen- and Boron-doped Triangulene as an Electrocatalyst for the Oxygen Reduction Reaction**

Thangaraj Thiruppathiraja, Pugal Neelam Parameswaran Senthana, Senthilkumar Lakshmiopathi\*

Department of Physics, Bharathiar University, Coimbatore-641 046, Tamil Nadu, India

*[\*] Corresponding author: Senthilkumar Lakshmiopathi Email: [lsenthilkumar@buc.edu.in](mailto:lsenthilkumar@buc.edu.in)*

**Table S1.** Thermodynamic properties of the N- and B-doped triangulene (N-tri and B-tri) of ORR at calculated B3LYP-D3(BJ) level of theory/eV.

| STRUCTURE | N-tri      |            |            | B-tri      |            |            |
|-----------|------------|------------|------------|------------|------------|------------|
|           | $\Delta E$ | $\Delta H$ | $\Delta G$ | $\Delta E$ | $\Delta H$ | $\Delta G$ |
| <b>R1</b> | 0          | 0          | 0          | 0          | 0          | 0          |
| <b>I1</b> | 1.51       | 1.46       | 1.63       | 0.41       | 0.38       | 0.46       |
| <b>R2</b> | 0          | 0          | 0          | 0          | 0          | 0          |
| <b>I2</b> | -2.35      | -2.33      | -2.37      | 0.61       | 0.64       | 0.59       |
| <b>R3</b> | 0          | 0          | 0          | 0          | 0          | 0          |
| <b>I3</b> | -4.58      | -4.54      | -4.64      | -1.38      | -1.36      | -1.42      |
| <b>R4</b> | 0          | 0          | 0          | 0          | 0          | 0          |
| <b>I4</b> | -3.09      | -3.12      | -3.06      | -0.09      | -0.07      | -0.12      |
| <b>R5</b> | 0          | 0          | 0          | 0          | 0          | 0          |
| <b>P1</b> | -2.82      | -2.78      | -2.91      | -2.90      | -2.85      | -3.02      |

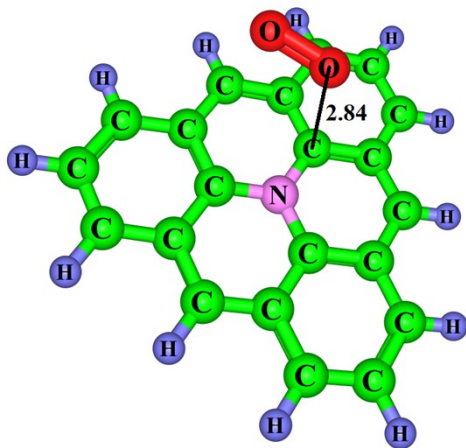

R1

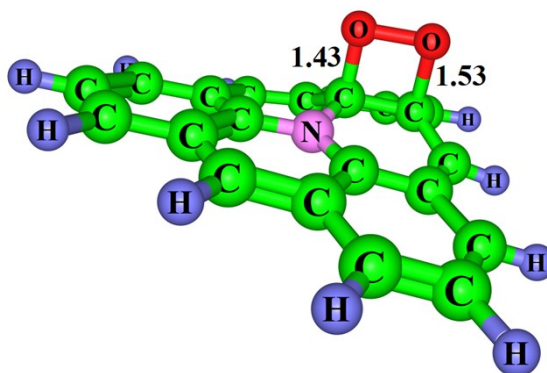

I1

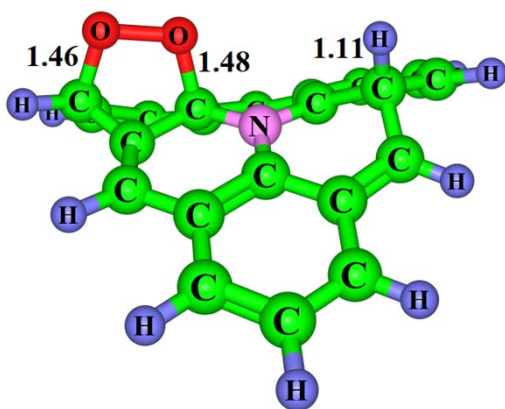

R2

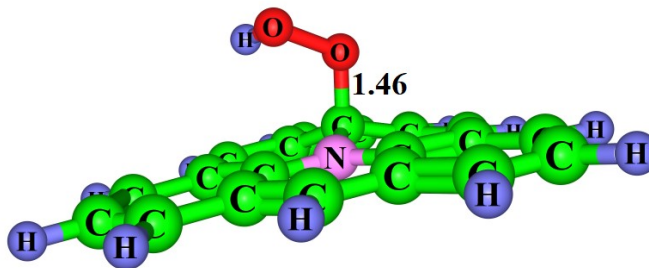

I2

**Fig S1.** The optimized geometry of N-doped triangulene (N-tri) with  $^*OO$ ,  $^*OOH$ ,  $^*O+H_2O$ ,  $^*OH$  and  $H_2O$  molecules in reactants (R), intermediates (I) and the final product (P).

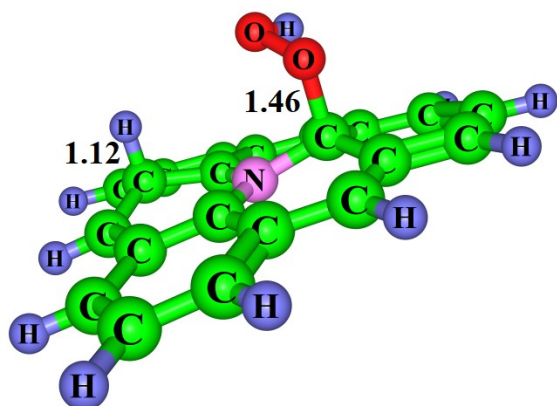

R3

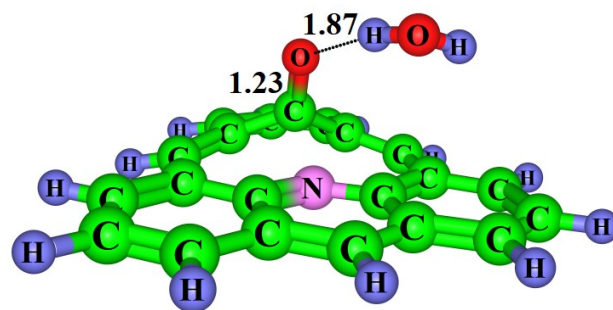

I3

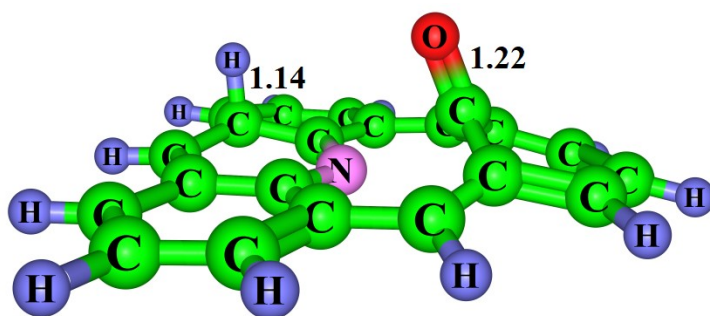

R4

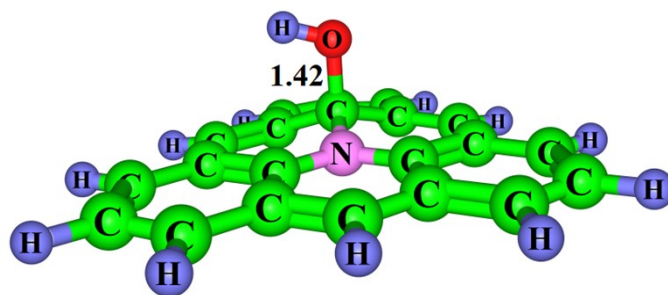

I4

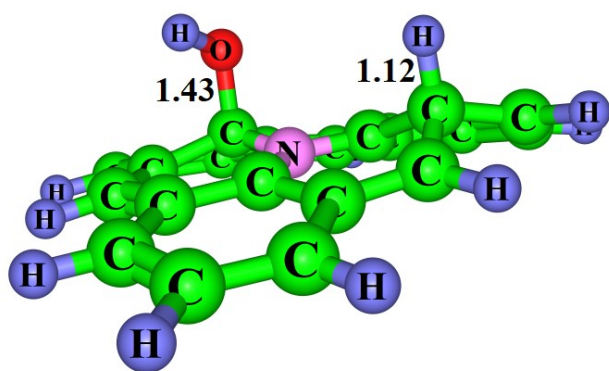

R5

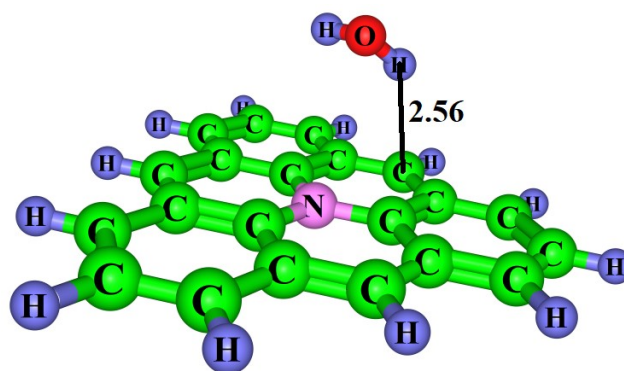

P1

Fig S1 contd...

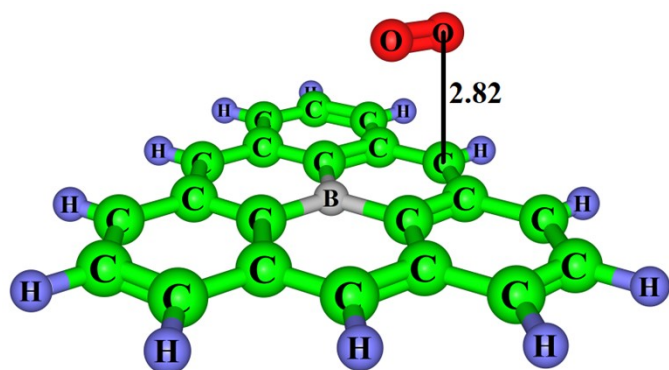

R1

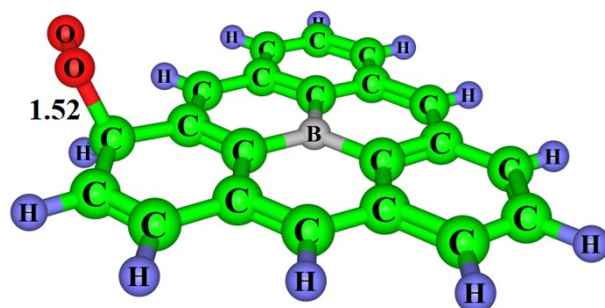

I1

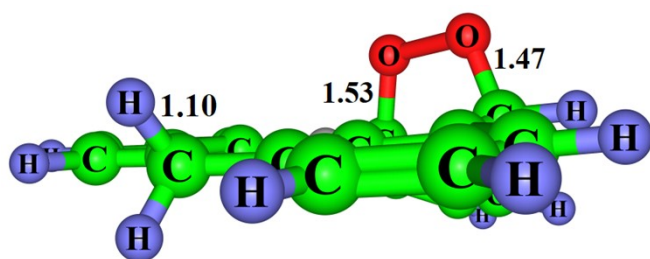

R2

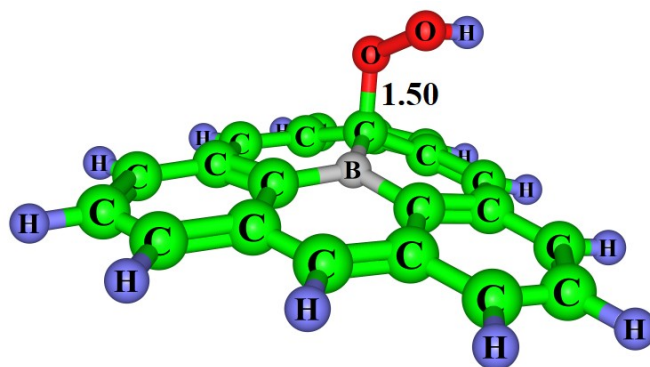

I2

**Fig S2.** The optimized geometry of B-doped triangulene (B-tri) with \*OO, \*OOH, \*O+H<sub>2</sub>O, \*OH and H<sub>2</sub>O molecules in reactants (R), intermediates (I) and the final product (P).

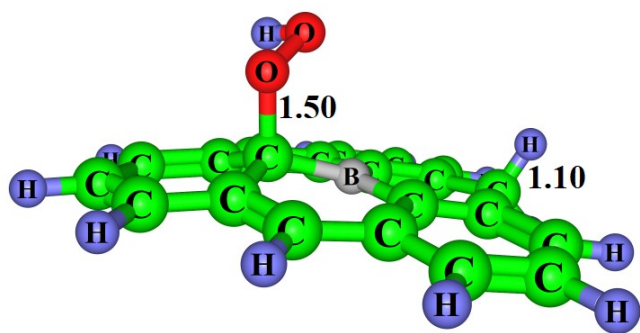

R3

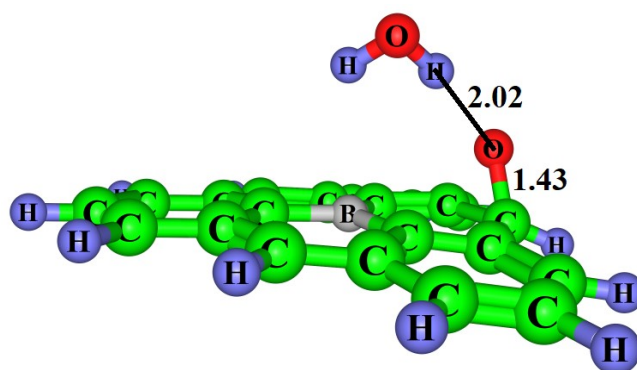

I3

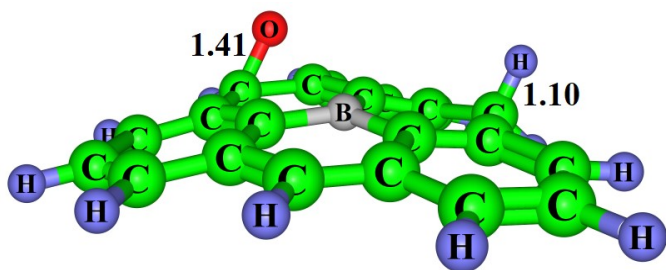

R4

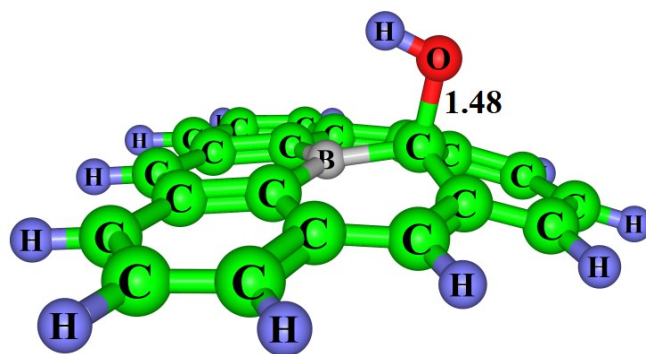

I4

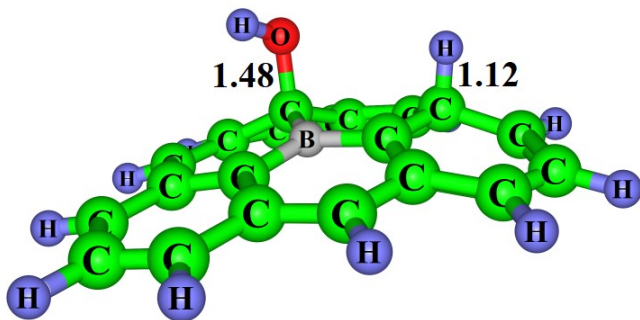

R5

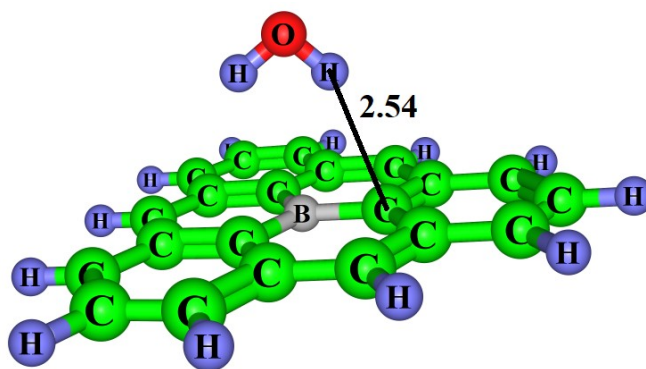

P1

Fig S2 contd...

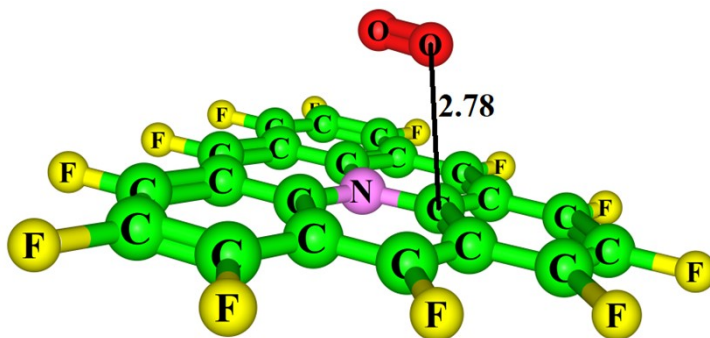

R1

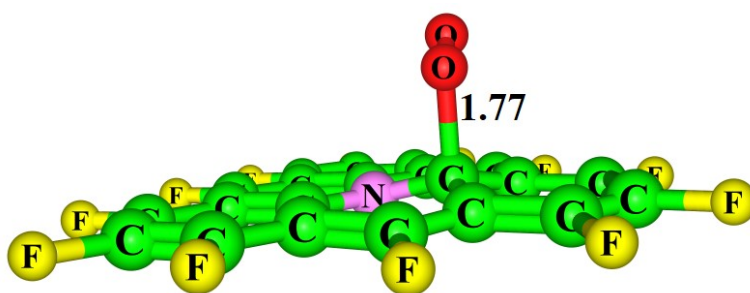

TS1

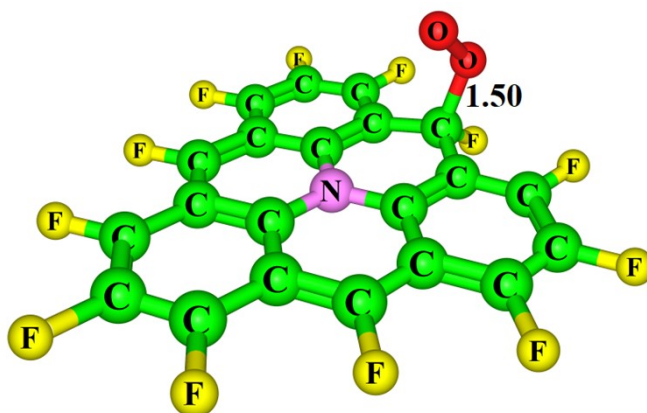

II

**Fig S3.** The optimized structures of reactants (R), transition states (TS), intermediates (I) and the final product (P) of ORR with F-N-tri.

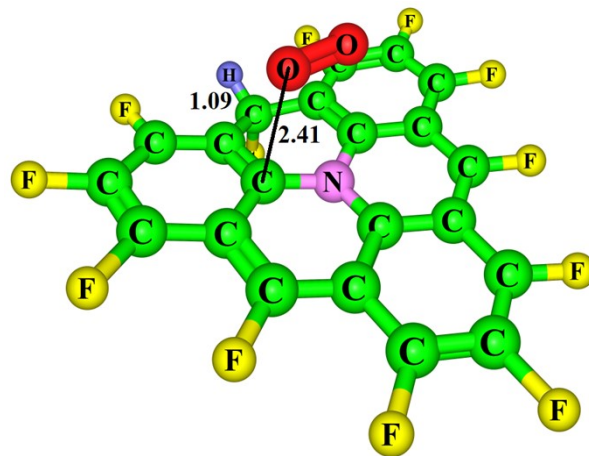

R2

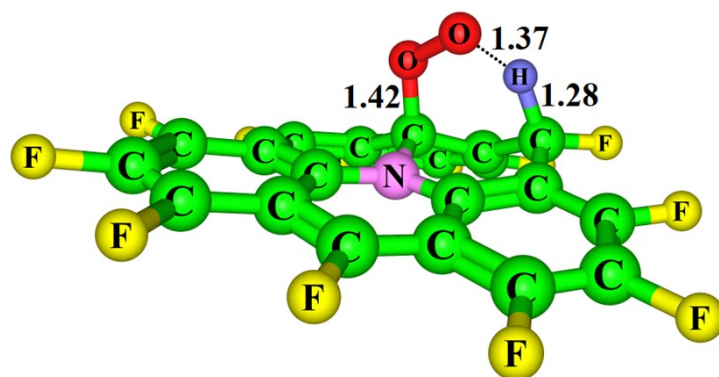

TS2

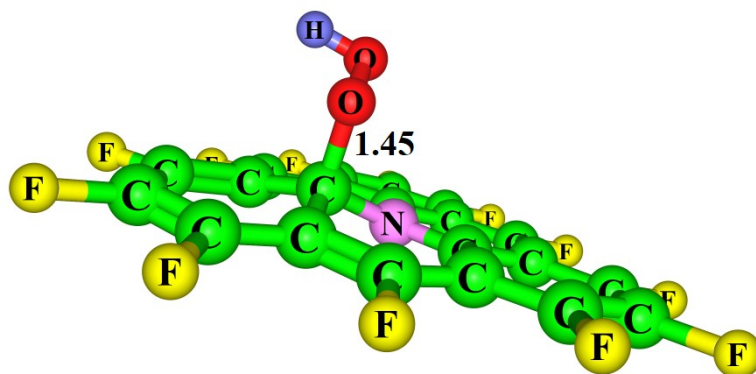

I2

Fig S3 contd...



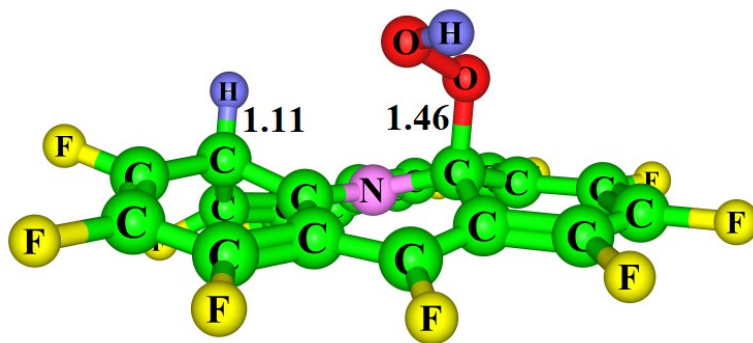

R3

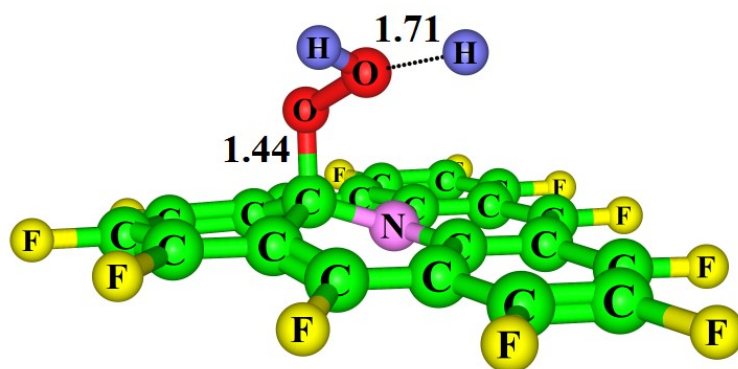

TS3

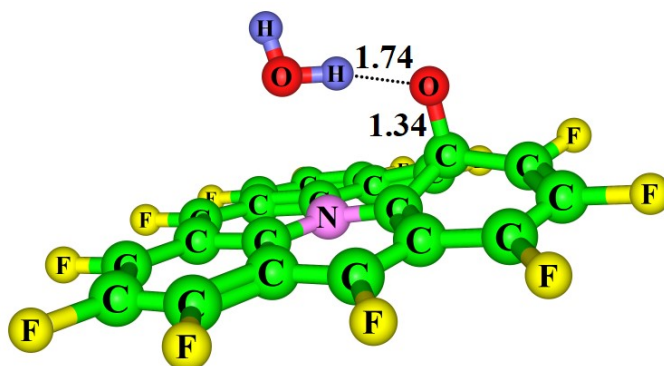

I3

Fig S3 contd...

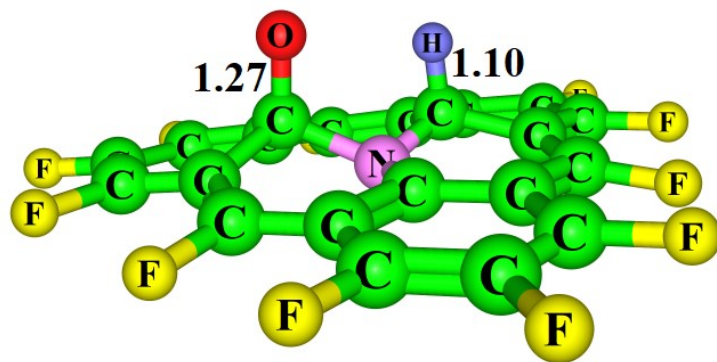

R4

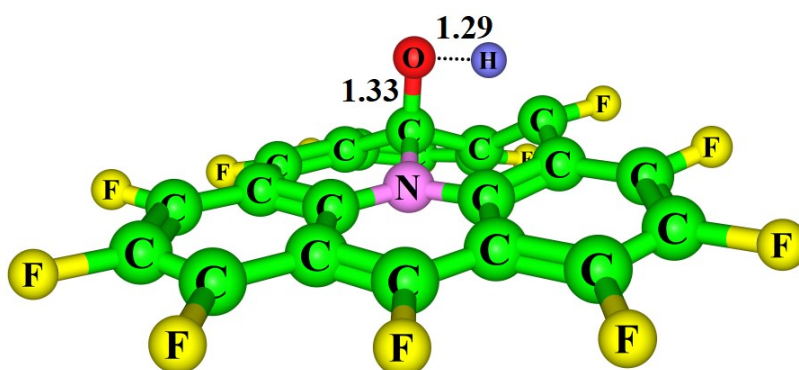

TS4

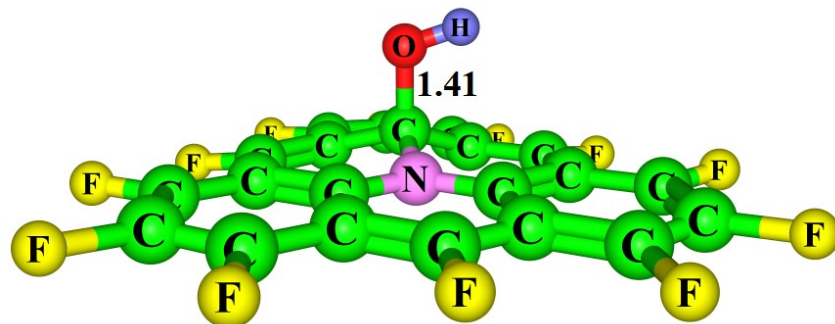

I4

Fig S3 contd...

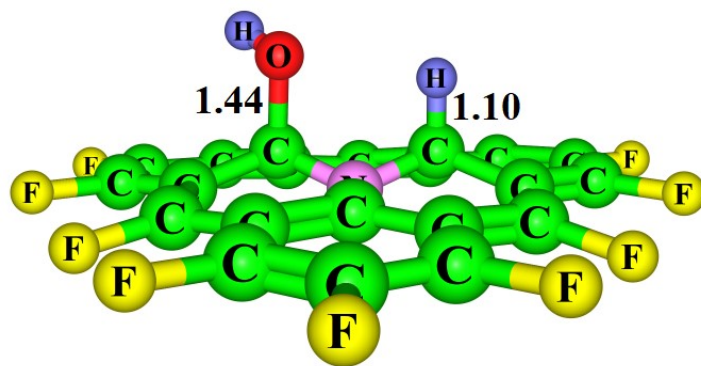

R5

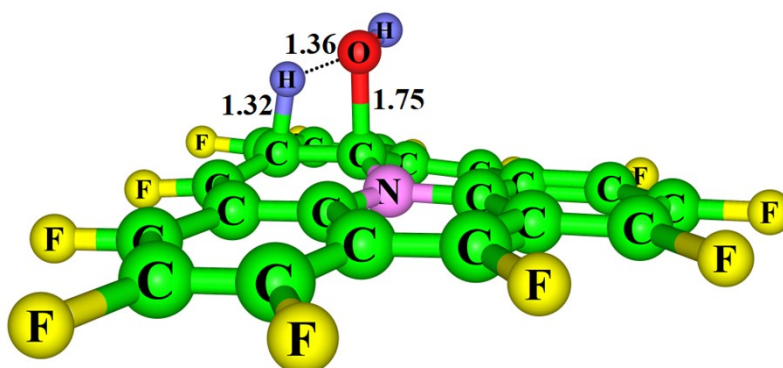

TS5

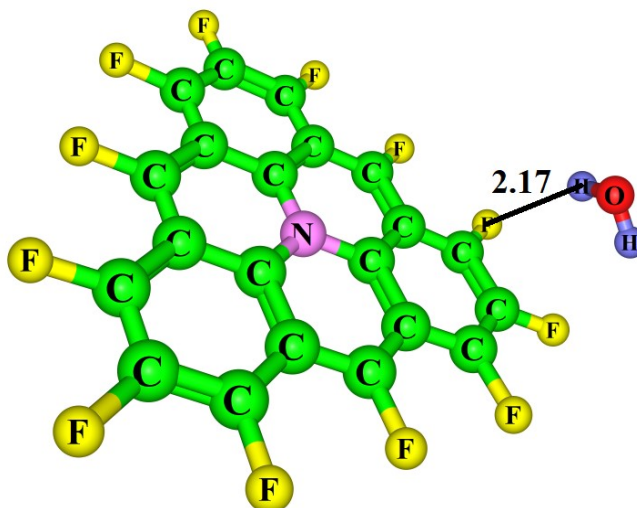

P1

Fig S3 contd...

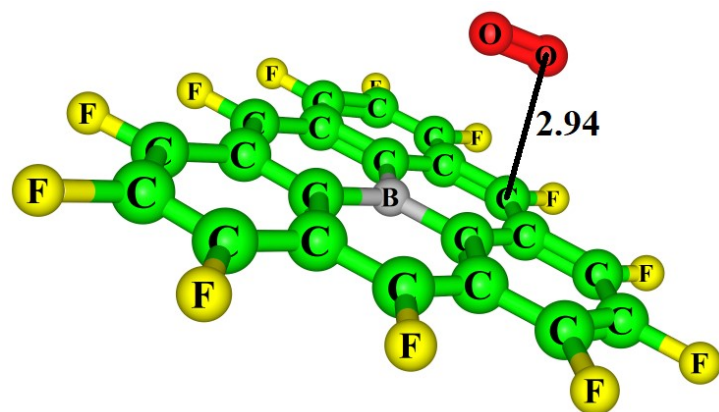

R1

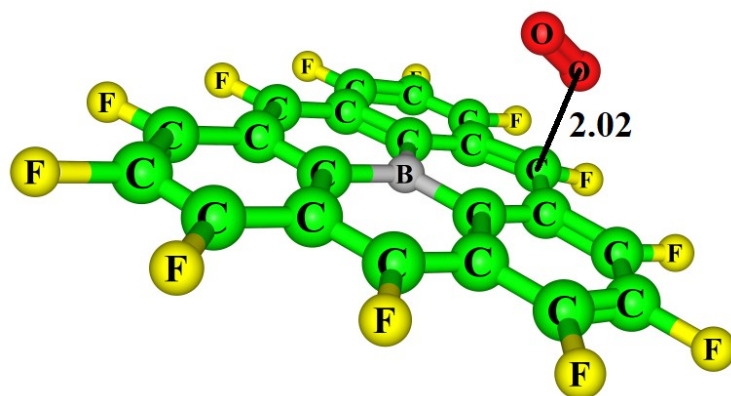

TS1

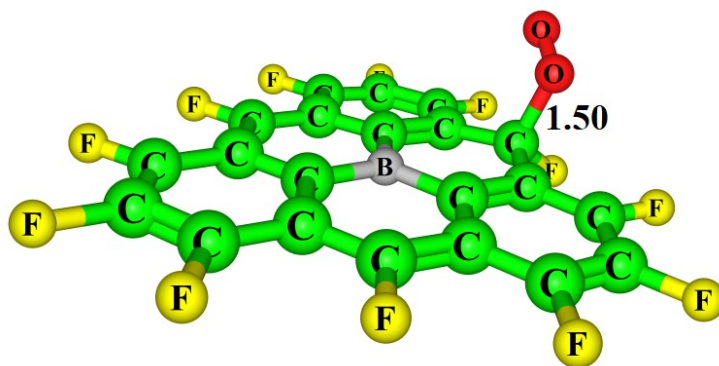

II

**Fig S4.** The optimized structures of reactants (R), transition states (TS), intermediates (I) and the final product (P) of ORR with F-B-tri.

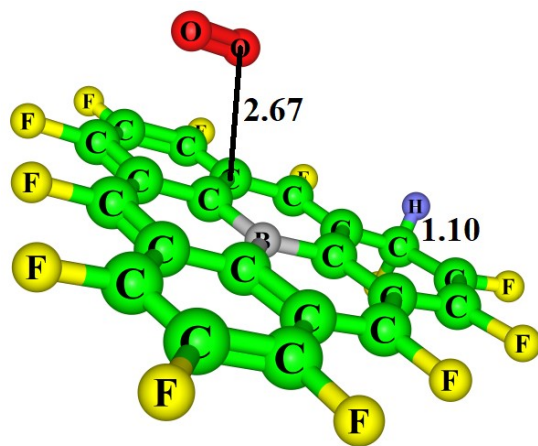

R2

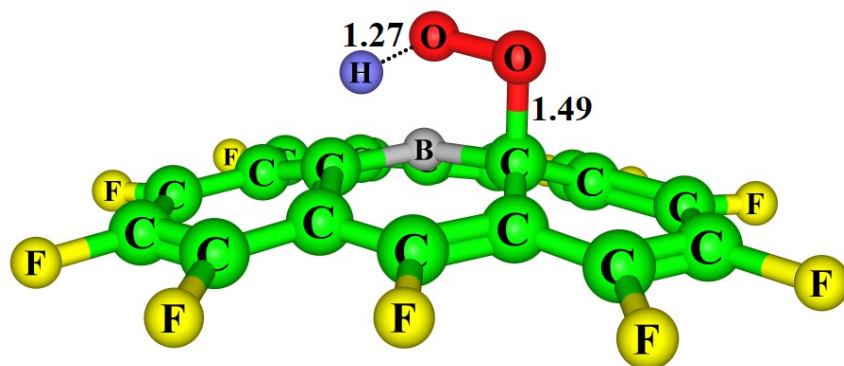

TS2

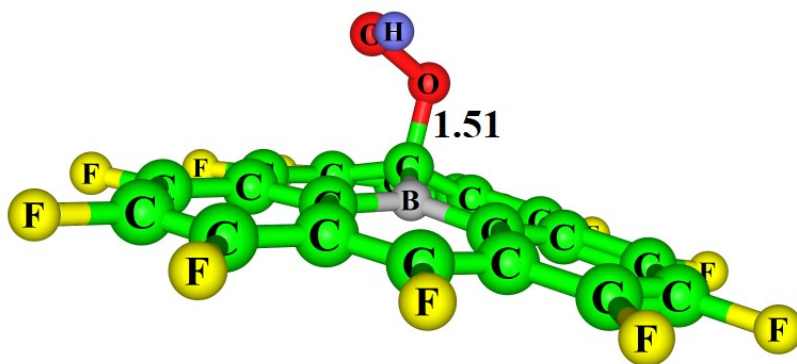

I2

Fig S4 contd...

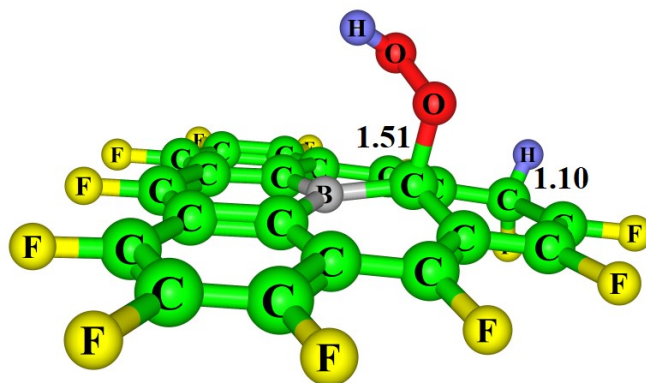

R3

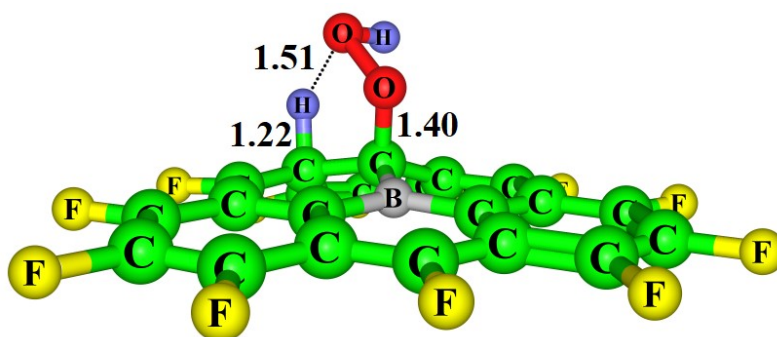

TS3

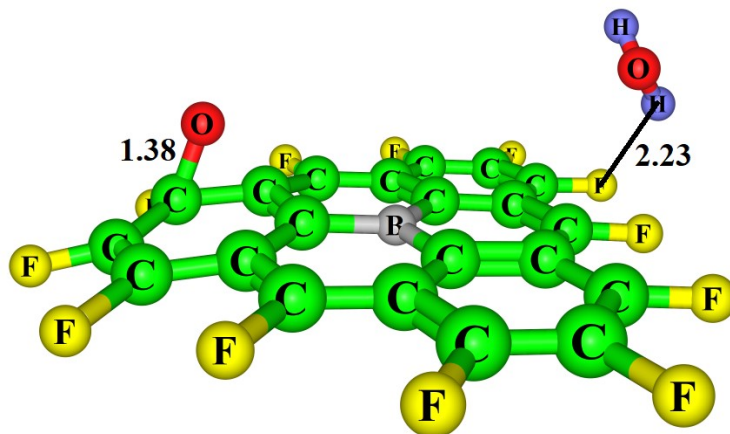

I3

Fig S4 contd...

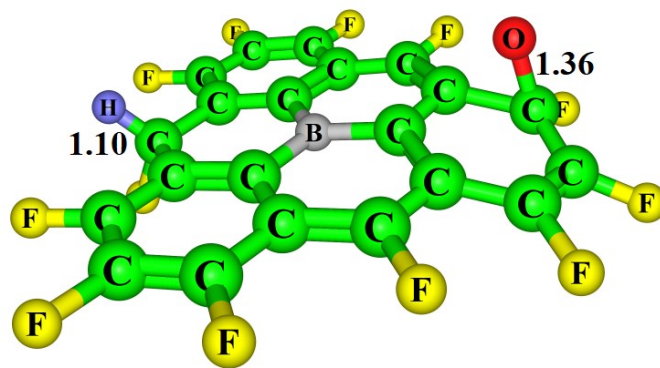

R4

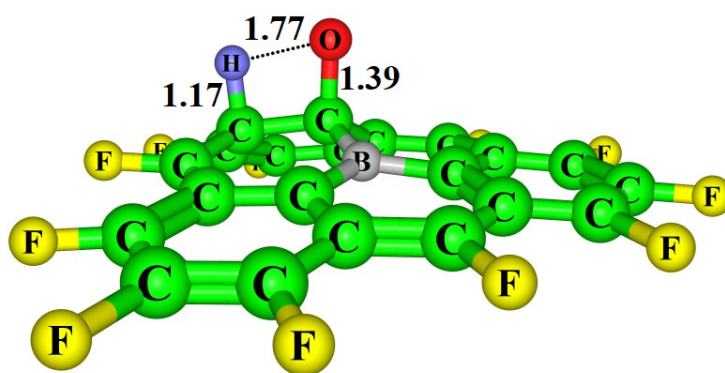

TS4

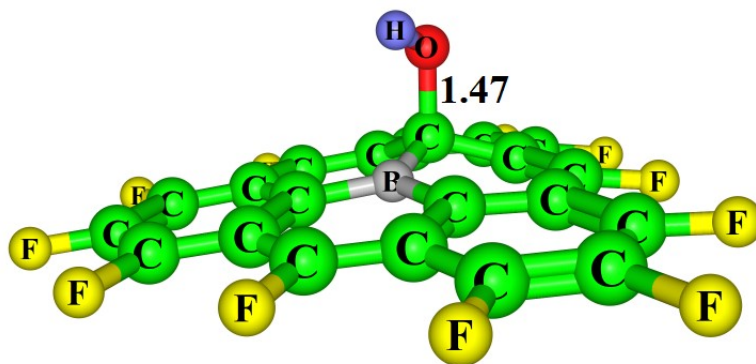

I4

Fig S4 contd...

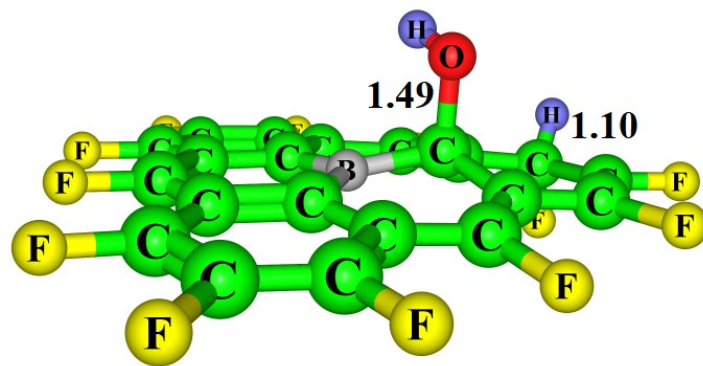

R5

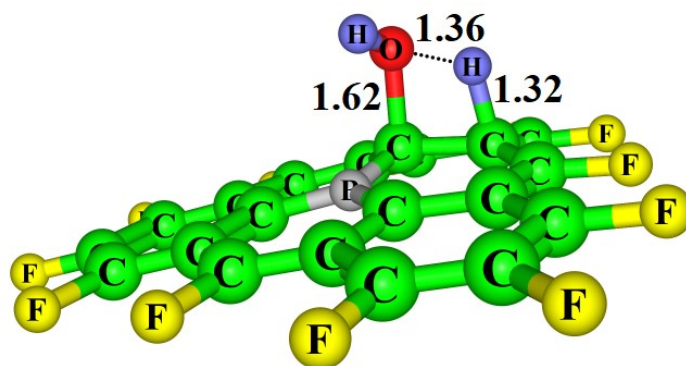

TS5

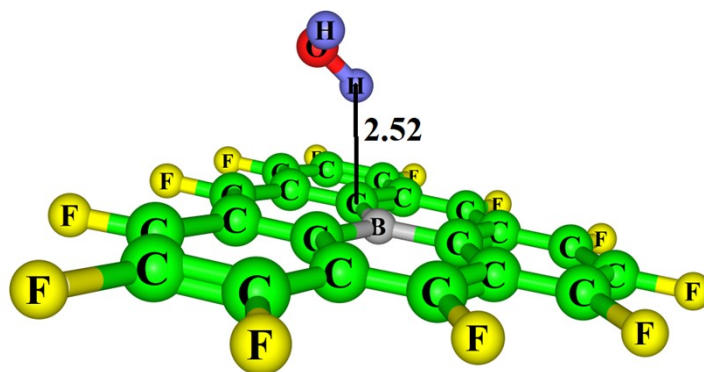

P1

Fig S4 contd...



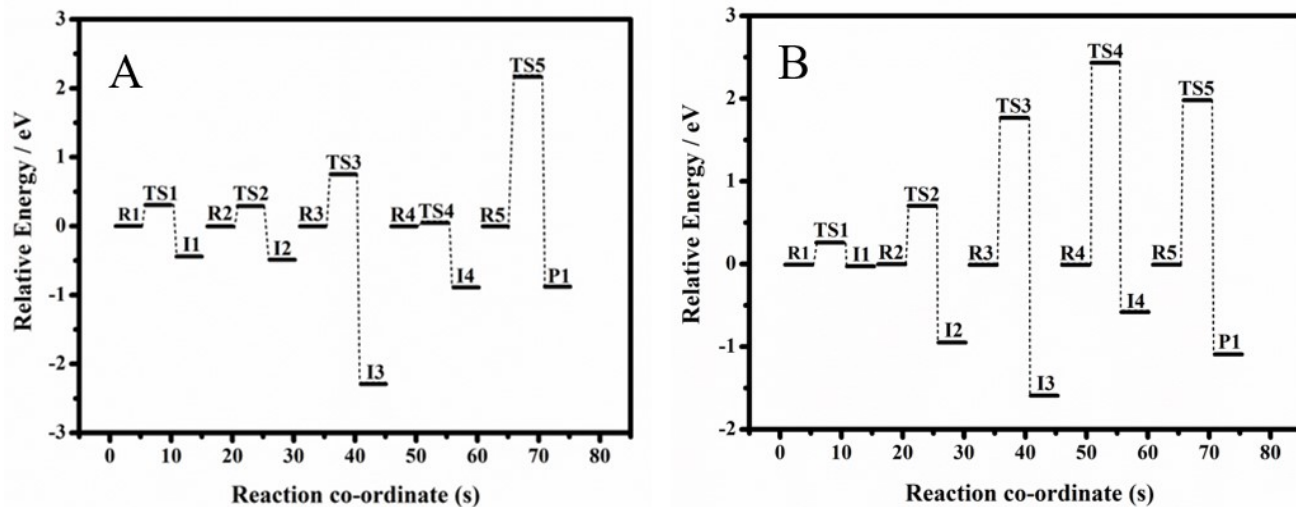

**Fig S5.** The relative energy profile of  $4e^-$  reduction pathway in the ORR steps are calculated at B3LYP-D3(BJ) level of theory for **A)** F-N-tri **B)** F-B-tri.

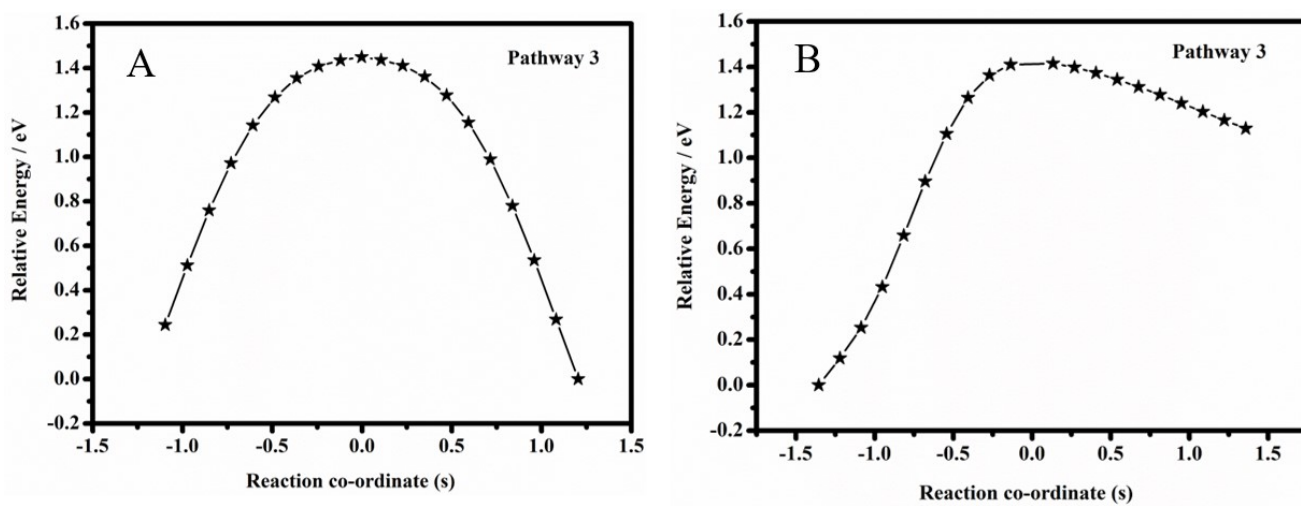

**Fig S6.** The intrinsic reaction coordinate (IRC) plots of ORR reaction calculated at B3LYP-D3(BJ) level of theory for **A)** F-N-tri **B)** F-B-tri.

**Table S2.** The rate limiting step ( $\Delta G_1$ ,  $\Delta G_2$ ,  $\Delta G_3$ ,  $\Delta G_4$ ), maximum free energy ( $G^{\text{ORR}}$ ) and overpotential ( $\eta^{\text{ORR}}$ ) are calculated for F-N-tri and F-B-tri molecules.

| <b>Molecules</b> | $\Delta G_1$<br>(eV) | $\Delta G_2$<br>(eV) | $\Delta G_3$<br>(eV) | $\Delta G_4$<br>(eV) | $G^{\text{ORR}}$<br>(eV) | $\eta^{\text{ORR}}$<br>(V) |
|------------------|----------------------|----------------------|----------------------|----------------------|--------------------------|----------------------------|
| <b>F-N-tri</b>   | -0.81                | -2.59                | -0.28                | -1.24                | -0.28                    | 1.16                       |
| <b>F-B-tri</b>   | -0.53                | -2.81                | -0.06                | -1.52                | -0.06                    | 1.21                       |
